# Supplementary material
Source: Springer Nature journal article supplement (https://www.springermedizin.de/resource/supplementary/12885_2013_4681_MOESM3_ESM.pdf/9467068)

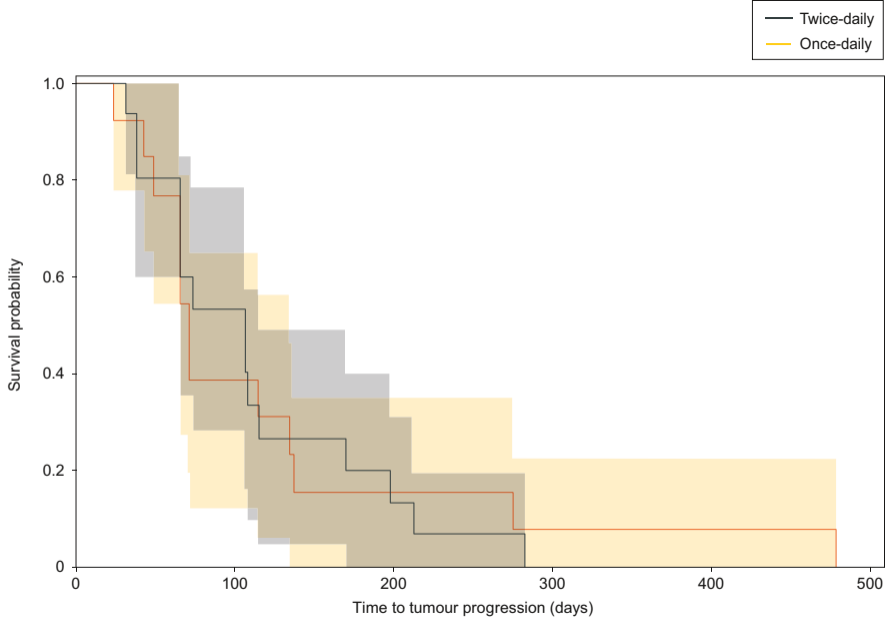

Twice-daily 16

8

2

0

0

0

Once-daily 13

5

2

1

1

0

Supplement: MOESM3 [file 9467068]
